# Supplementary material
Source: Springer Nature journal article supplement (https://www.springermedizin.de/resource/supplementary/13098_2009_30_MOESM3_ESM.pdf/9670376)

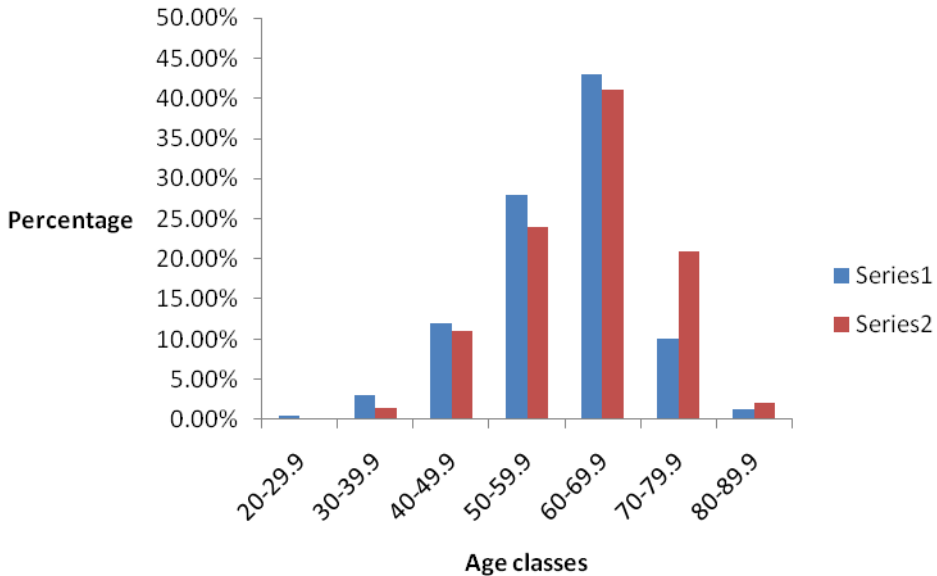

Series 1-females, Series 2-males

Supplement: MOESM3 [file 9670376]
